# Supplementary material
Source: publisher figshare collection journal article supplement (https://acs.figshare.com/ndownloader/files/4576075)
Supplement: Supplementary file 1 [file 4576075]

# Autoxidation of Platinum(IV) Hydrocarbyl Hydride Complexes to Form Platinum(IV) Hydrocarbyl Hydroperoxide Complexes

*Jennifer L. Look, Douglas D. Wick, James M. Mayer, and Karen I. Goldberg\**

Department of Chemistry, Box 351700,  
University of Washington, Seattle, WA 98195-1700  
goldberg@chem.washington.edu

## Supporting Information

### Rate constants for equations 6 from text

Linear regression was used to fit the kinetic data from the autoxidation of **1a** to the rate law:

$$\text{rate} = k_1[\mathbf{1a}] + k_2 \frac{[\mathbf{1a}][\mathbf{2a}][\text{AIBN}]}{[\mathbf{1a}] + [\mathbf{2a}] + [\mathbf{3a}]} \quad (6)$$

Consistent values were obtained for  $k_2$  with varying concentrations of **1a** (8 – 31 mM) and AIBN (5-10 mM).

| mM <b>1a</b> | mM AIBN | $k_2$ (M <sup>-1</sup> s <sup>-1</sup> ) | +/-  | $k_1$ (s <sup>-1</sup> ) | +/-      | R <sup>2</sup> |
|--------------|---------|------------------------------------------|------|--------------------------|----------|----------------|
| 15.7         | 3.5     | 0.23                                     | 0.01 | 7.83E-05                 | 1.20E-05 | 0.987          |
| 30.5         | 3.4     | 0.23                                     | 0.01 | 6.97E-05                 | 1.67E-05 | 0.969          |
| 8.4          | 3.7     | 0.23                                     | 0.01 | 5.50E-05                 | 2.28E-05 | 0.955          |
| 13.7         | 10.2    | 0.23                                     | 0.01 | 2.61E-06                 | 5.75E-05 | 0.961          |
| 13.7         | 5.1     | 0.23                                     | 0.01 | 3.46E-05                 | 2.79E-05 | 0.911          |

The  $k_1$  term probably includes a dependence on AIBN, but the values are not precise enough to determine the nature of the dependence. The uncertainties associated with the  $k_1$  values are too large to provide any information about the initial formation of the hydroperoxide.

### Rate constants for equation 7 from text

For the phenyl compounds, the non-overlapping NMR signals available for integration were of lower intensity, resulting in worse signal-to-noise ratios. More concentrated solutions could not be used because of solubility limitations, so the kinetic data for **1b** is noisier leading to less

consistent values for the rate constants. The data are still convincingly in agreement with the proposed rate law.

$$\text{rate} = k_1[\mathbf{1b}] + k_2[\mathbf{1b}][\mathbf{2b}]_{\text{formed}}^{1/2}[\text{AIBN}]^{1/2} \quad (7)$$

| mM <b>1b</b> | mM AIBN | $k_2$ ( $\text{M}^{-1}\text{s}^{-1}$ ) | +/-   | $k_1$ ( $\text{s}^{-1}$ ) | +/-       | $R^2$ | % conv. |
|--------------|---------|----------------------------------------|-------|---------------------------|-----------|-------|---------|
| 29.6         | 11.2    | 0.019                                  | 0.001 | 2.48E-04                  | 1.271E-04 | 0.981 | 44      |
| 14.8         | 10.7    | 0.034                                  | 0.001 | 8.49E-04                  | 2.187E-04 | 0.979 | 60      |
| 6.4          | 9.7     | 0.078                                  | 0.004 | -5.16E-04                 | 6.659E-04 | 0.917 | 75      |
| 31.8         | 6.0     | 0.039                                  | 0.002 | -1.65E-03                 | 3.450E-04 | 0.950 | 63      |
| 14.3         | 3.5     | 0.047                                  | 0.001 | -1.14E-04                 | 1.307E-04 | 0.968 | 49      |
| 15.7         | 2.5     | 0.045                                  | 0.001 | -2.97E-05                 | 3.739E-06 | 0.954 | 64      |

The average value for  $k_2$ ,  $0.043 \pm 0.017 \text{ M}^{-1}\text{s}^{-1}$  is significantly slower than for the autoxidation of **1a**. Again, nothing can be discerned about the  $k_1$  pathway because the associated uncertainties are so large (the true values should of course be positive, the regression values are just listed to show that this method is not adequate for determining anything about the slow initial process.).

#### Reactions with low AIBN concentrations for **1a**

At low concentrations of AIBN, confusing behavior is observed. Increasing the AIBN concentration from 0.035 mM to 0.07 mM doubles the rate, but the reaction is much faster ( $k_2$  is more than 2 orders of magnitude larger than at moderate AIBN concentrations described above). Further increasing the concentration to 2 mM AIBN drastically slows the reaction. The mechanism of autocatalysis appears to involve reaction of the AIBN radical with the hydroperoxide **2a**. Perhaps this step is more efficient at lower AIBN concentrations since coupling of AIBN-derived radicals is more likely at higher concentrations.

| mM <b>1a</b> | mM AIBN | $k_2$ ( $\text{M}^{-1}\text{s}^{-1}$ ) | +/-  | $k_1$ ( $\text{s}^{-1}$ ) | +/-      | $R^2$ |
|--------------|---------|----------------------------------------|------|---------------------------|----------|-------|
| 13.6         | 0.03    | 80                                     | 1.82 | 4.49E-05                  | 2.20E-05 | 0.997 |
| 13.7         | 0.07    | 79                                     | 8.70 | 2.50E-04                  | 2.83E-04 | 0.940 |
| 15.4         | 2.2     | 0.79                                   | 0.01 | 7.78E-05                  | 7.93E-06 | 0.997 |
